# Supplementary material for: Modulation of Measles Virus NTAIL Interactions through Fuzziness and Sequence Features of Disordered Binding Sites
Source: MDPI journal article supplement (doi:10.3390/biom9010008), 2018-12-27
Supplement: s1 [file s1]

## Supplementary Information

# Modulation of measles virus N<sub>TAIL</sub> interactions through fuzziness and sequence features of disordered binding sites

Christophe Bignon <sup>1,\*</sup>, Francesca Troilo <sup>1,2</sup>, Stefano Gianni <sup>2</sup> and Sonia Longhi <sup>1,\*</sup>

<sup>1</sup> CNRS and Aix-Marseille Univ, Laboratoire Architecture et Fonction des Macromolécules Biologiques (AFMB), UMR 7257, Marseille, France

<sup>2</sup> Istituto Pasteur – Fondazione Cenci Bolognetti, Dipartimento di Scienze Biochimiche ‘A. Rossi Fanelli’ and Istituto di Biologia e Patologia Molecolari del Consiglio Nazionale delle Ricerche, Sapienza Università di Roma, Rome, Italy

\* To whom correspondence should be addressed.

## Materials and Methods

### *Split-GFP complementation assay*

*E. coli* T7-pRos (*i.e.*, T7 cells (New England Biolabs) bearing the pLysS plasmid from Rosetta(DE3) pLysS cells (Novagen)) were co-transformed with plasmid pNGG bearing the coding sequence of either full-length N<sub>TAIL</sub> (401) or its truncation variants (411 to 481), and plasmid pMRBAD-link-CGFP bearing the coding sequence of either XD or hsp70, and then plated on ampicillin- and kanamycin-containing agar plates. The next day, several colonies were scraped off the plate and used to seed 4 ml of Luria Bertani medium containing ampicillin (100 µg/ml), kanamycin (50 µg/ml), and chloramphenicol (34 µg/ml) in 24-wells deep-wells. Chloramphenicol was used to maintain the pRos plasmid. After one night at 37°C under 200 rpm shaking, pre-cultures were used to seed 3 wells of 24-wells deep-wells with 300 µl of each pre-culture per well and each well containing 4 ml of terrific broth with the same three antibiotics. Cells were grown for an additional 2.5 hours at 37°C. IPTG and arabinose were then added to each culture well at the respective final concentrations of 0.5 mM and 2%, and the deep-wells were incubated over night at 17°C under shaking. The next day, the deep-wells were spun for 5' at 4000 g in a swinging rotor and the supernatant was discarded. Cell pellets were resuspended in 1 ml of PBS and 10 µl of each cell suspension were diluted in 100 µl PBS in each well of a 96-wells clear bottom black microplate. The optical density at 600 nm (*i.e.*, the number of cells) (OD<sub>600</sub>) and GFP fluorescence (Fluo) of each well were measured using a TECAN GENios Plus spectrofluorimeter. The fluorescence value of each well was divided by the OD<sub>600</sub> of the same well (Fluo/OD<sub>600</sub> ratio), and the mean value of each triplicate ratio and standard deviation were calculated. Results were expressed either as Fluo/OD<sub>600</sub> or as percentage. In the latter case, 100% is the value provided by full-length wtN<sub>TAIL</sub>.
